# Supplementary material for: Prediction of Biochar Yield and Specific Surface Area Based on Integrated Learning Algorithm
Source: MDPI journal article supplement (doi:10.3390/c10010010), 2024-01-12
Supplement: s1 [file s1]

# **Supporting Information-Prediction of biochar yield and specific surface area based on integrated machine learning algorithm models**

Xiaohu Zhou<sup>a</sup>, Xiaochen Liu<sup>ab\*</sup>, Linlin Sun<sup>a</sup>, Xinyu Jia<sup>a</sup>, Fie tian<sup>a</sup>, Yueqin Liu<sup>c</sup>, Zhansheng Wu<sup>a\*</sup>

a School of Environmental and Chemical Engineering, Xi'an Key Laboratory of Textile Chemical Engineering Auxiliaries, Xi'an Polytechnic University, Xi'an 710048, P.R. China

b School of Chemical Engineering, Shaanxi Key Laboratory of Degradable Biomedical Materials, Northwest University, Xi'an 710069, P.R. China

c School of Life Science, Yan'an University, Xi'an, 716000, P.R. China

\*Email:

liuxiaochen@xpu.edu.cn (Xiaochen Liu \*)

wuzhans@xpu.edu.cn (Zhansheng Wu \*)

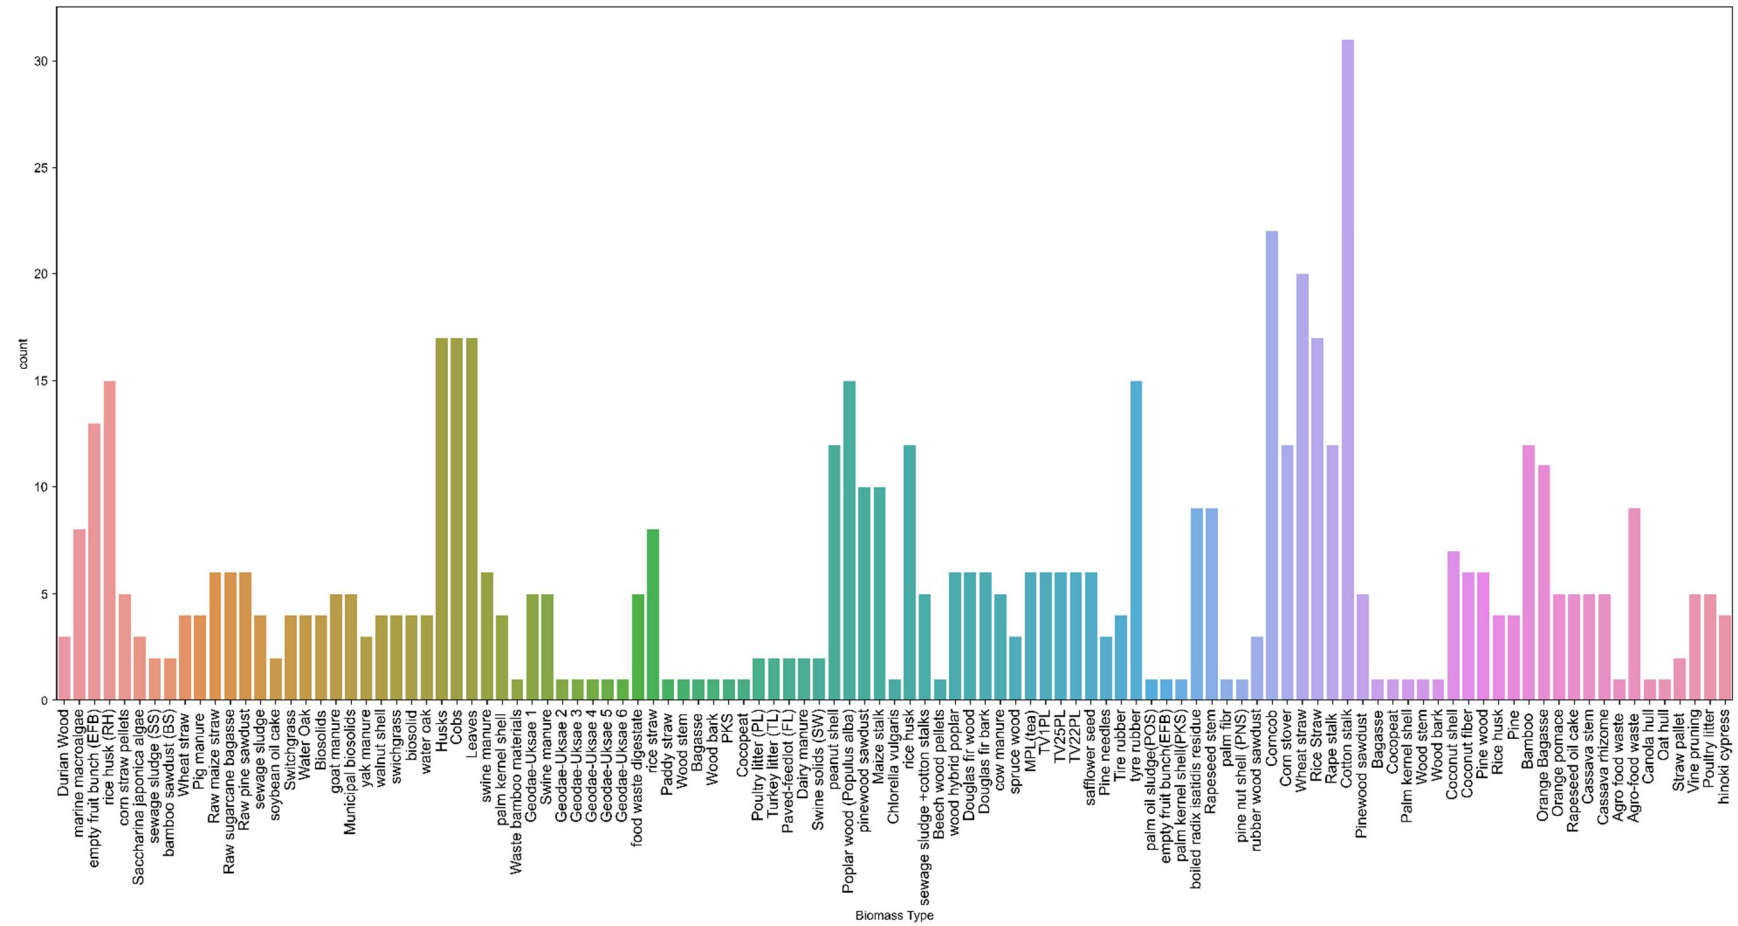

Figure S1 Statistical bar chart of biomass feedstocks in the dataset

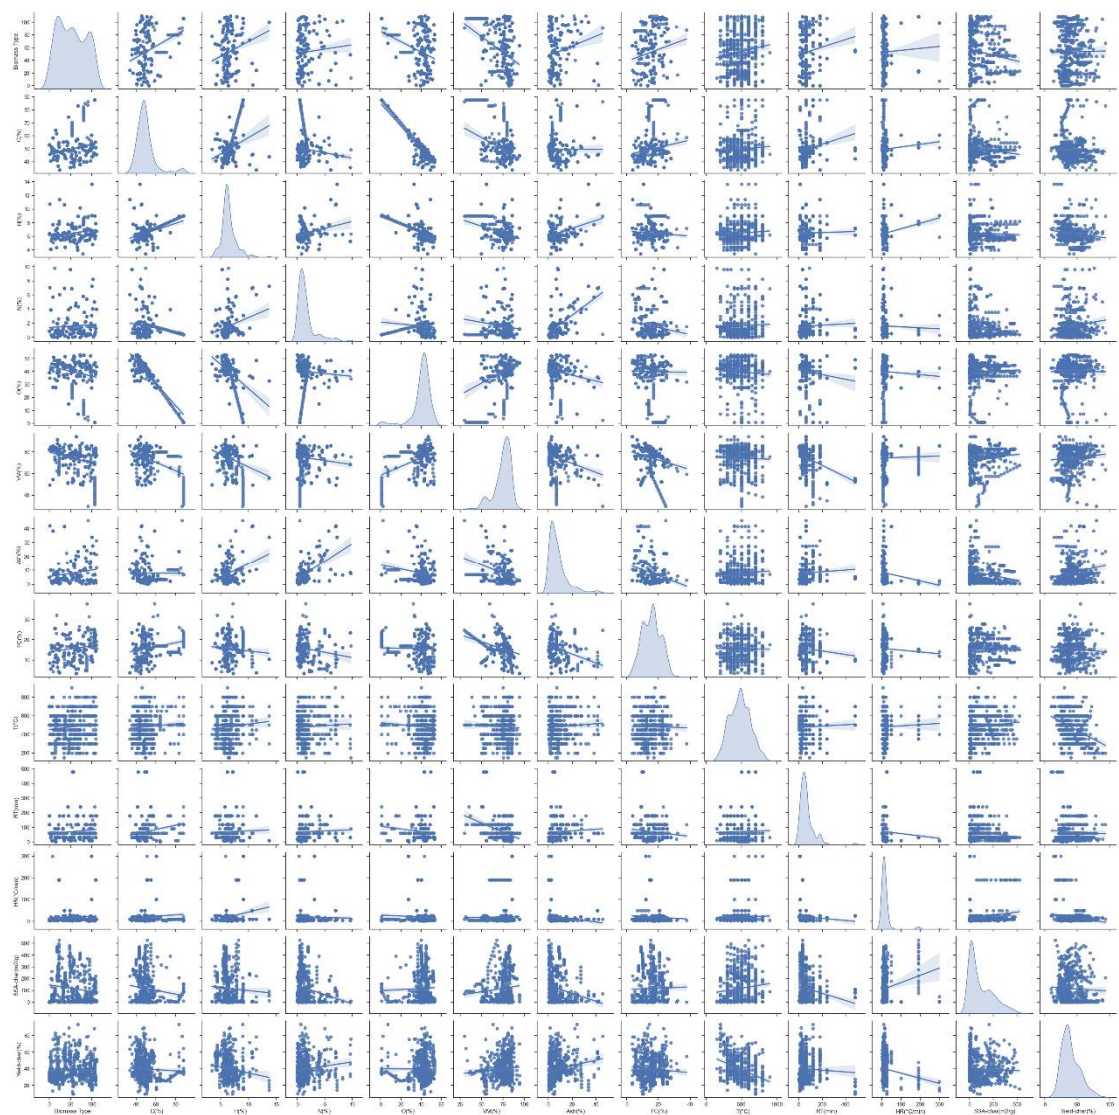

Figure S2 Multivariate joint distribution plots for the biochar dataset

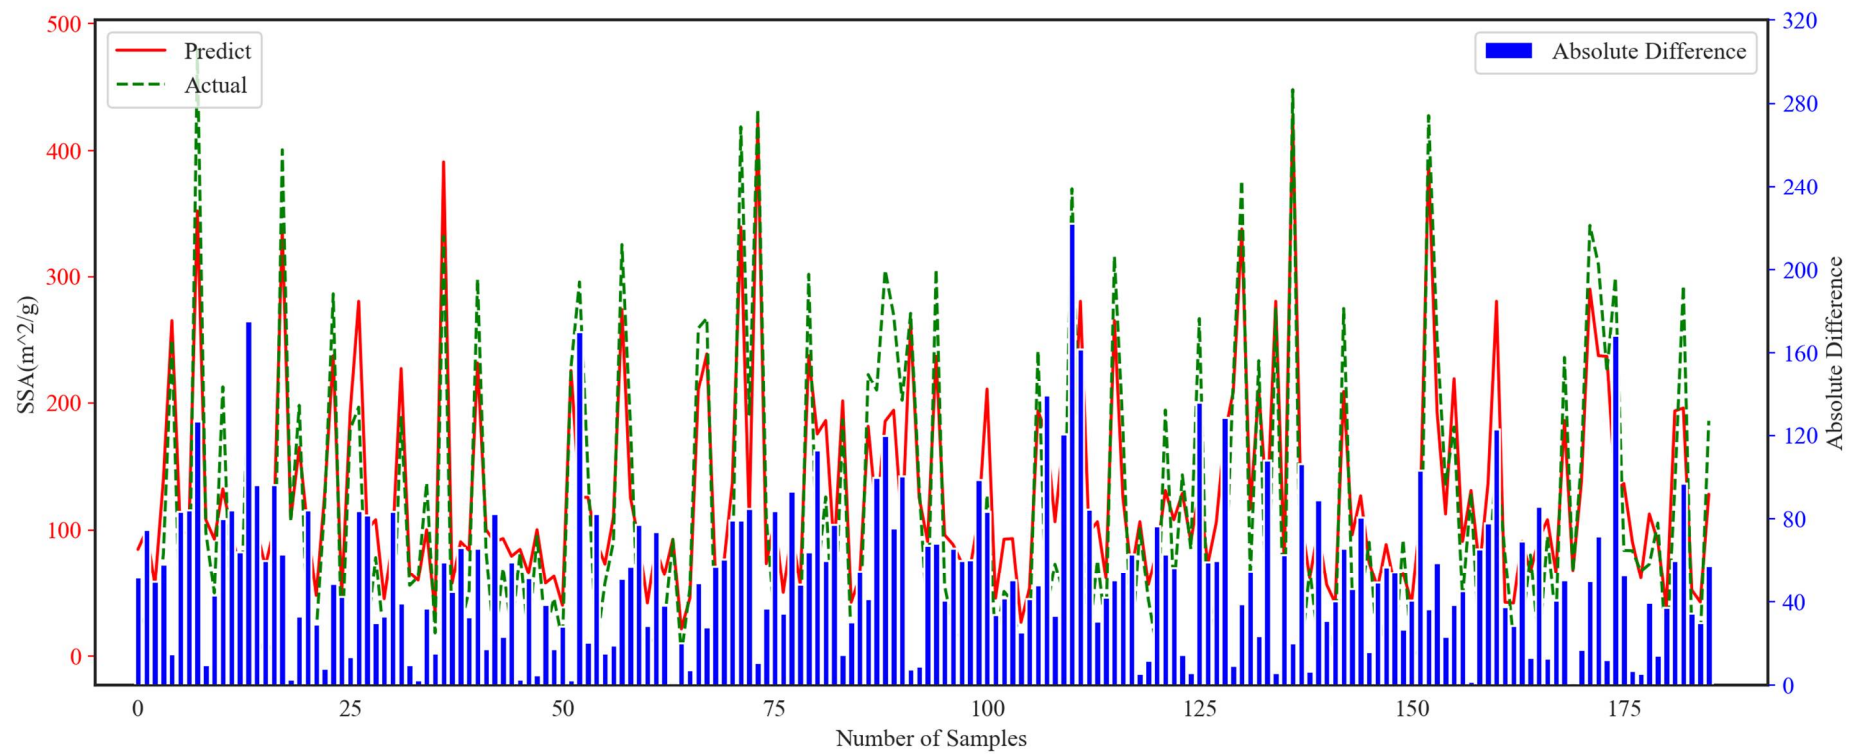

Figure S3 The graph displays AdaBoost's fitting curve for SSA-char. The red dashed line represents the predicted value, the green dashed line represents the true value, and the blue bar represents the absolute difference between the predicted and true values. The left axis indicates the value of SSA, while the right axis indicates the absolute difference.

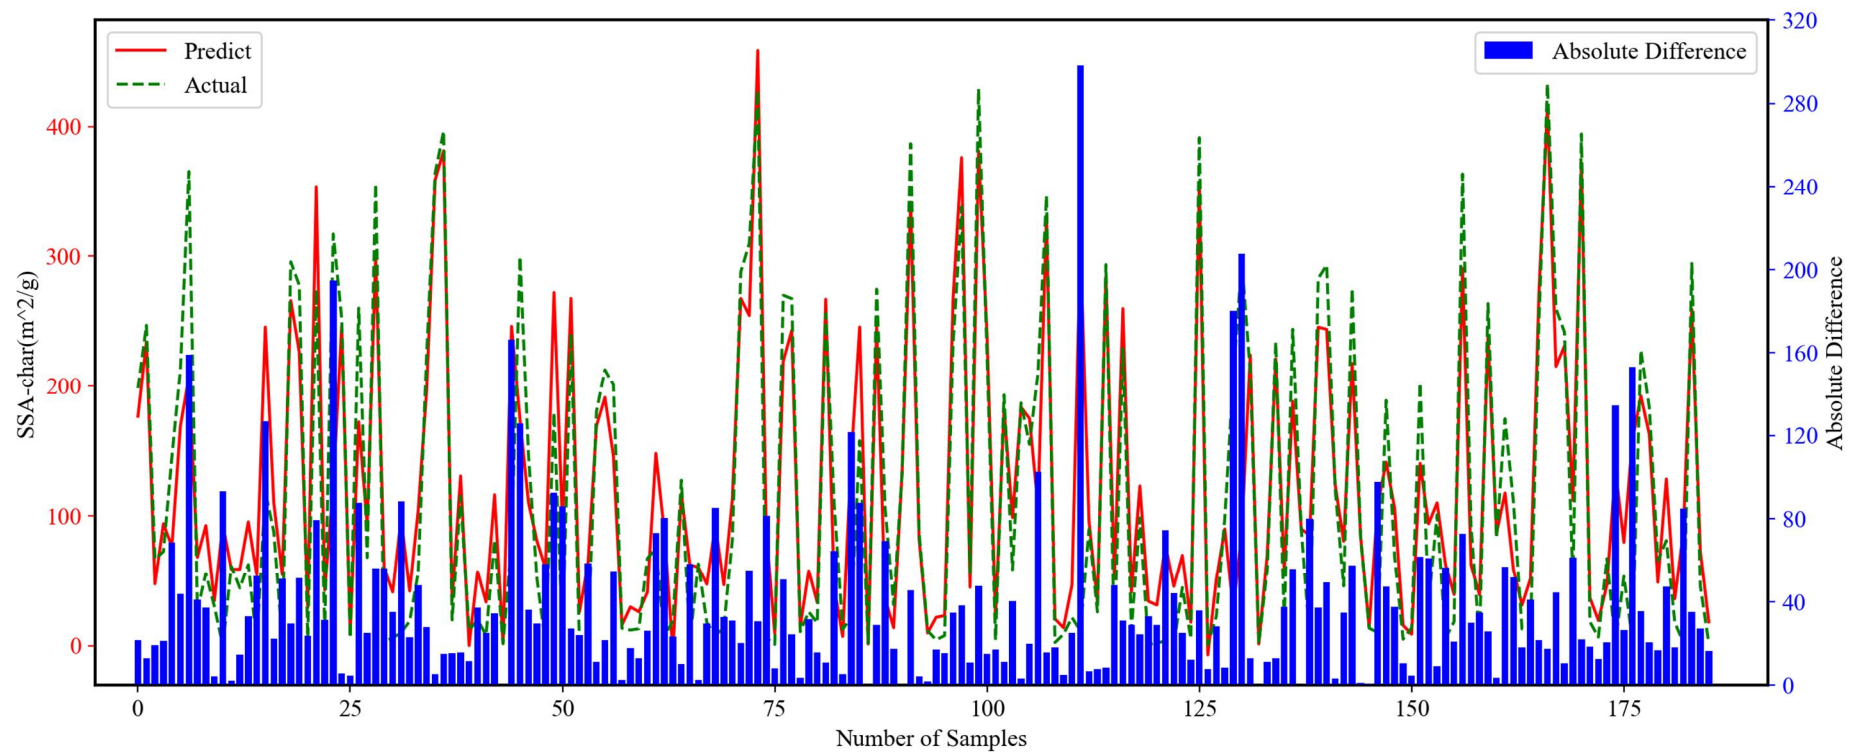

Figure S4 The graph displays GBDT's fitting curve for SSA-char. The red dashed line represents the predicted value, the green dashed line represents the true value, and the blue bar represents the absolute difference between the predicted and true values. The left axis indicates the value of SSA, while the right axis indicates the absolute difference.



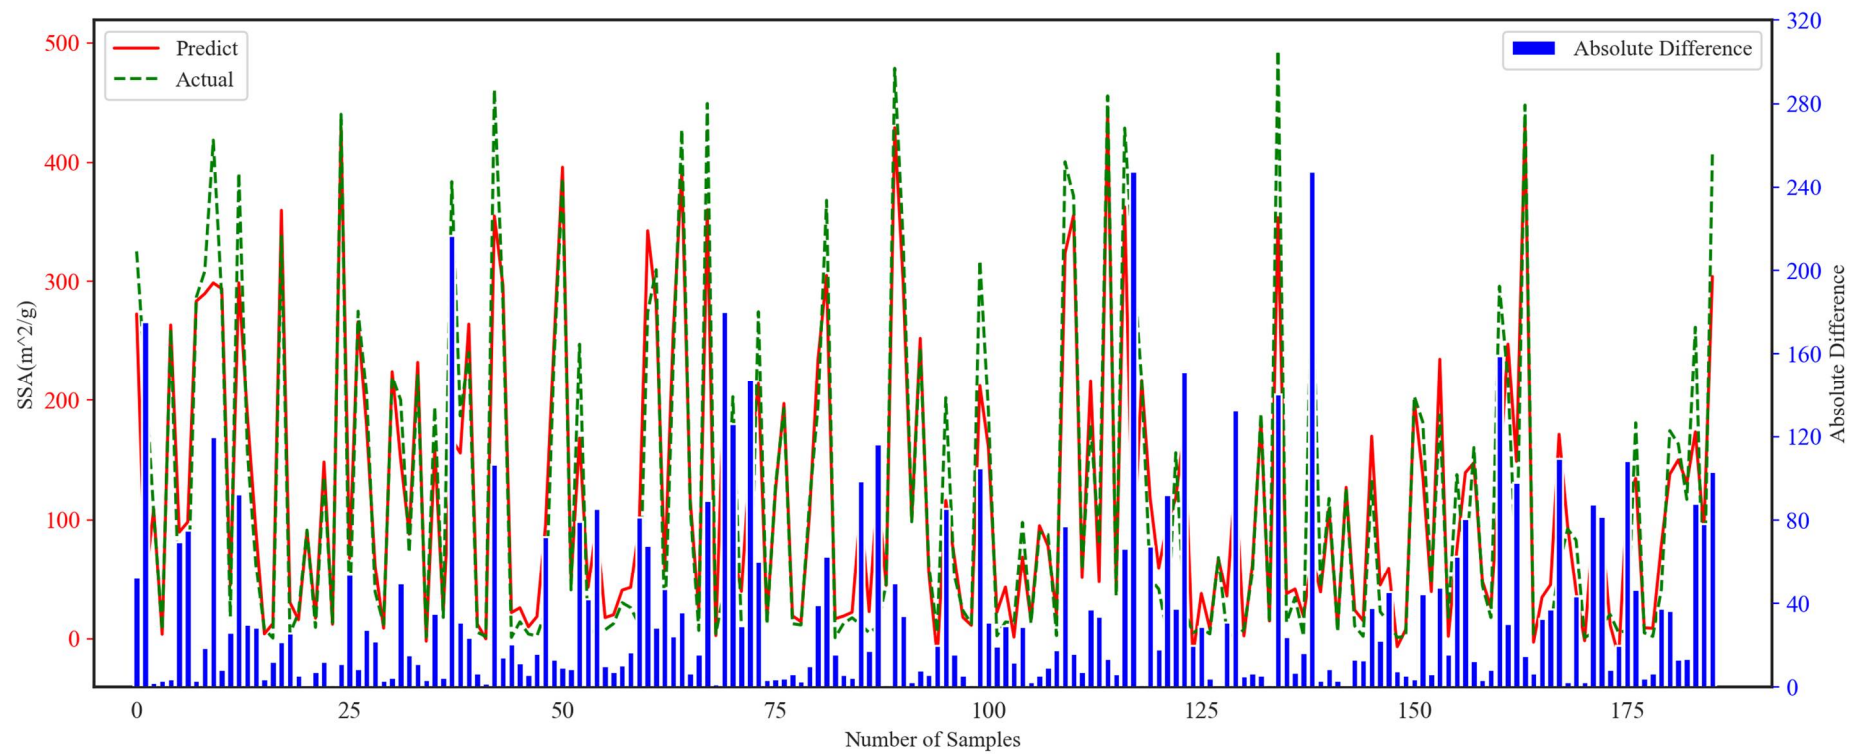

Figure S5 The graph displays LightGBM's fitting curve for SSA-char. The red dashed line represents the predicted value, the green dashed line represents the true value, and the blue bar represents the absolute difference between the predicted and true values. The left axis indicates the value of SSA, while the right axis indicates the absolute difference.

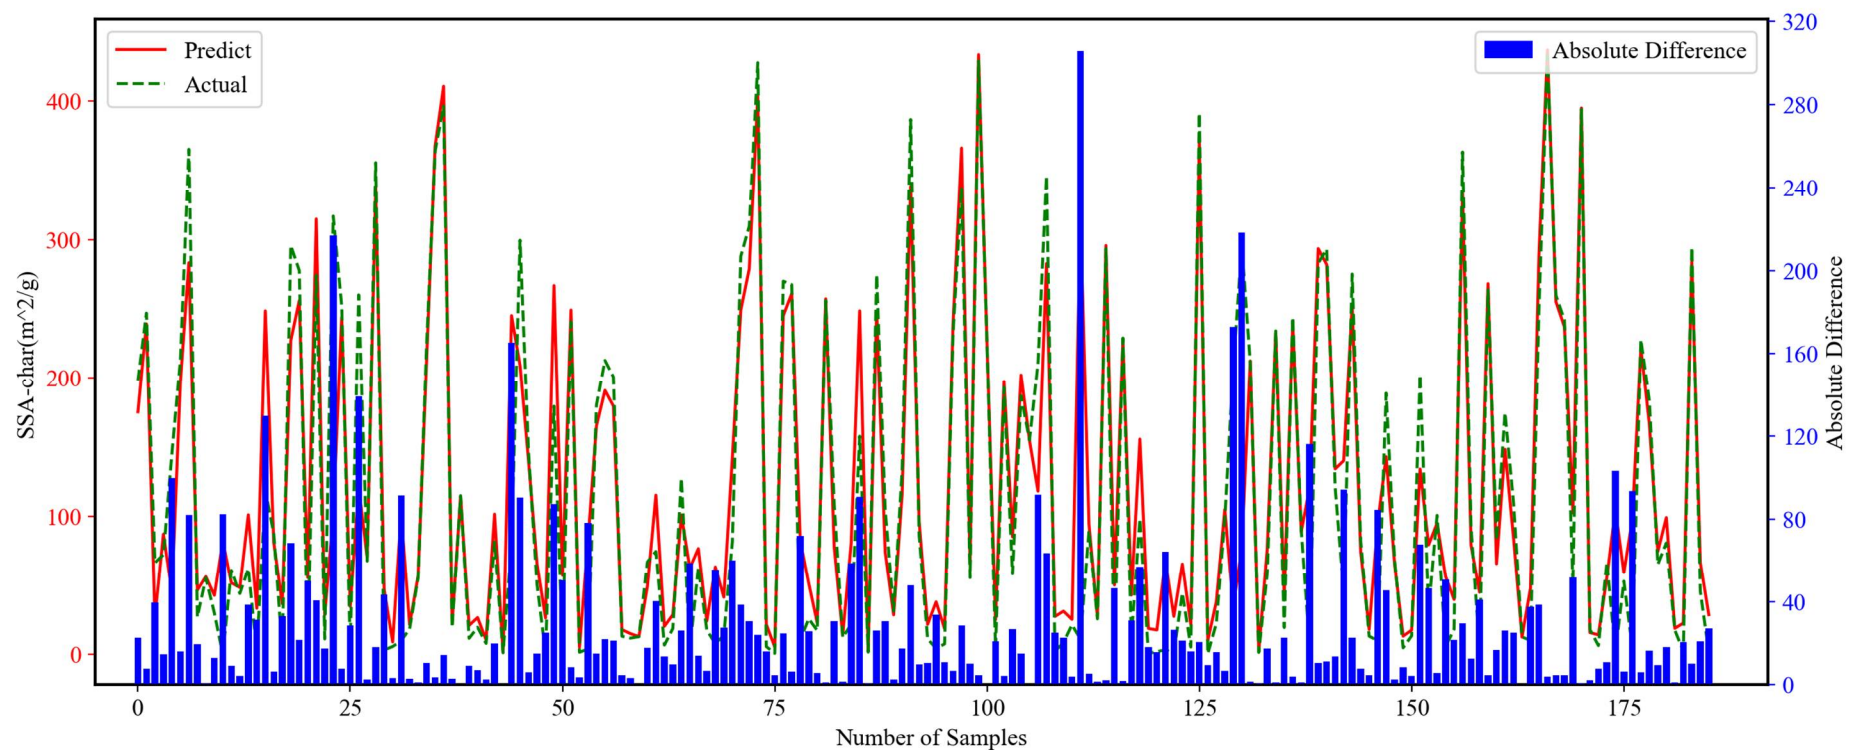

Figure S6 The graph displays RandomForest's fitting curve for SSA-char. The red dashed line represents the predicted value, the green dashed line represents the true value, and the blue bar represents the absolute difference between the predicted and true values. The left axis indicates the value of SSA, while the right axis indicates the absolute difference.

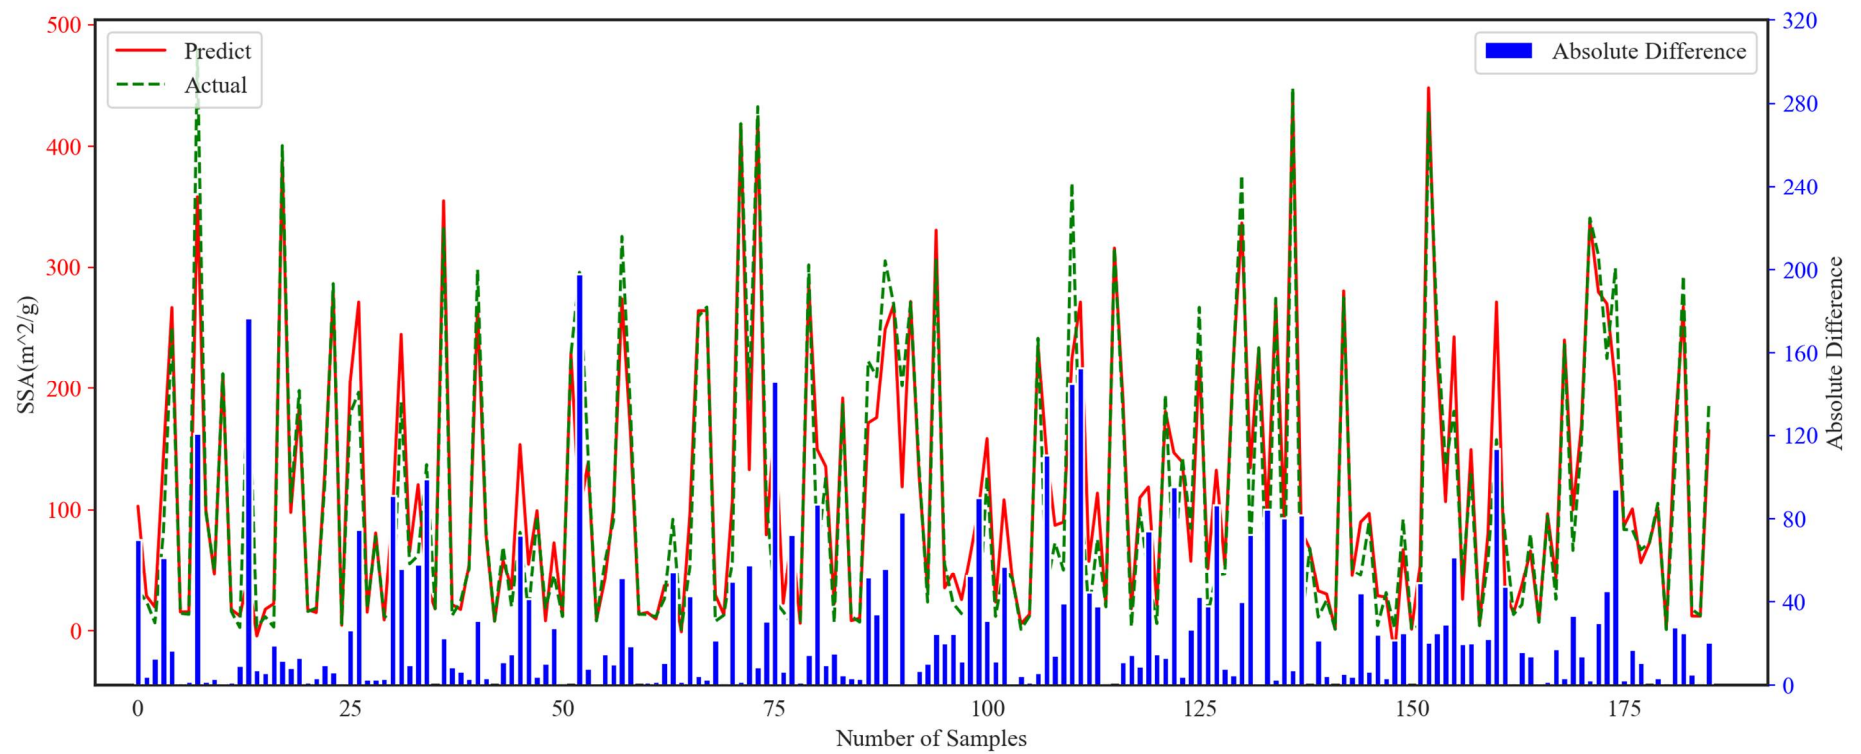

Figure S7 The graph displays XGBoost's fitting curve for SSA-char. The red dashed line represents the predicted value, the green dashed line represents the true value, and the blue bar represents the absolute difference between the predicted and true values. The left axis indicates the value of SSA, while the right axis indicates the absolute difference.



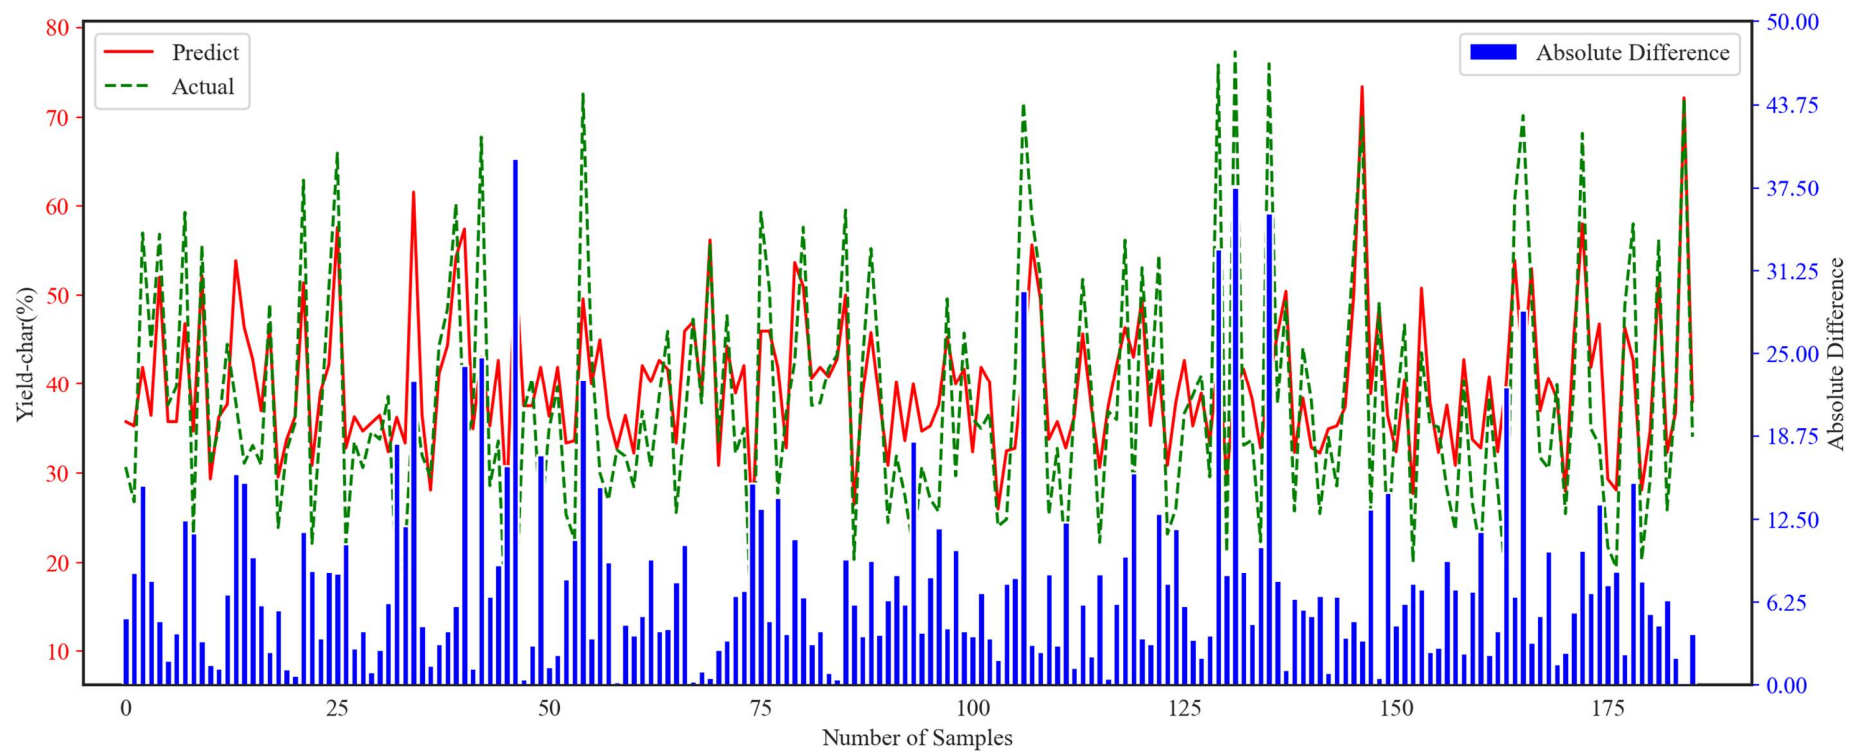

Figure S8 The graph displays Adaboost's fitting curve for Yield-char. The red dashed line represents the predicted value, the green dashed line represents the true value, and the blue bar represents the absolute difference between the predicted and true values. The left axis indicates the value of Yield, while the right axis indicates the absolute difference.

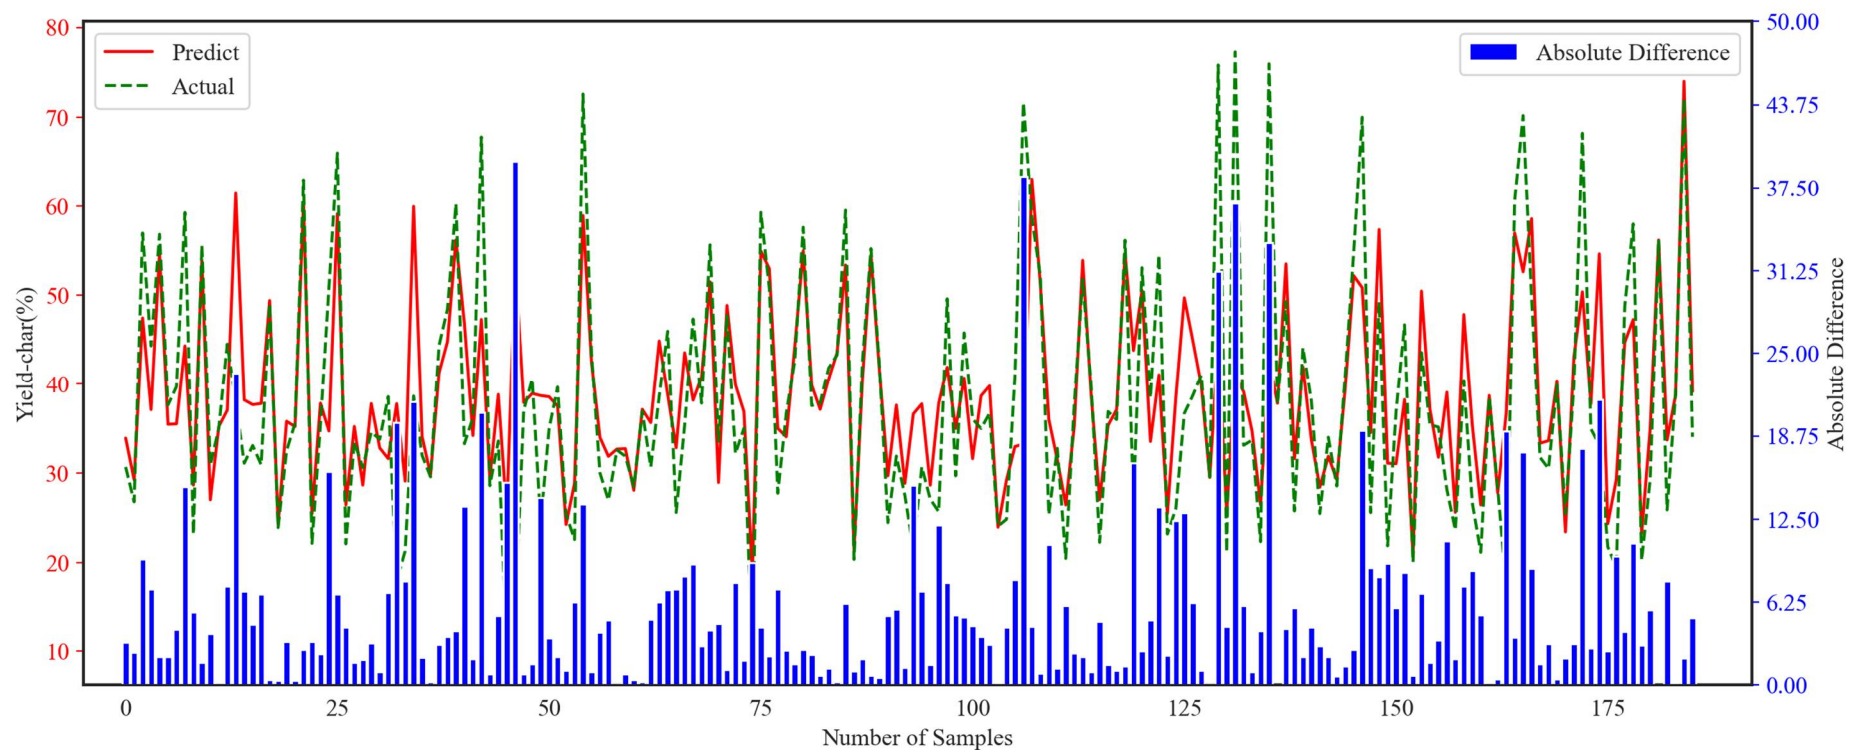

Figure S9 The graph displays GBDT's fitting curve for Yield-char. The red dashed line represents the predicted value, the green dashed line represents the true value, and the blue bar represents the absolute difference between the predicted and true values. The left axis indicates the value of Yield, while the right axis indicates the absolute difference.

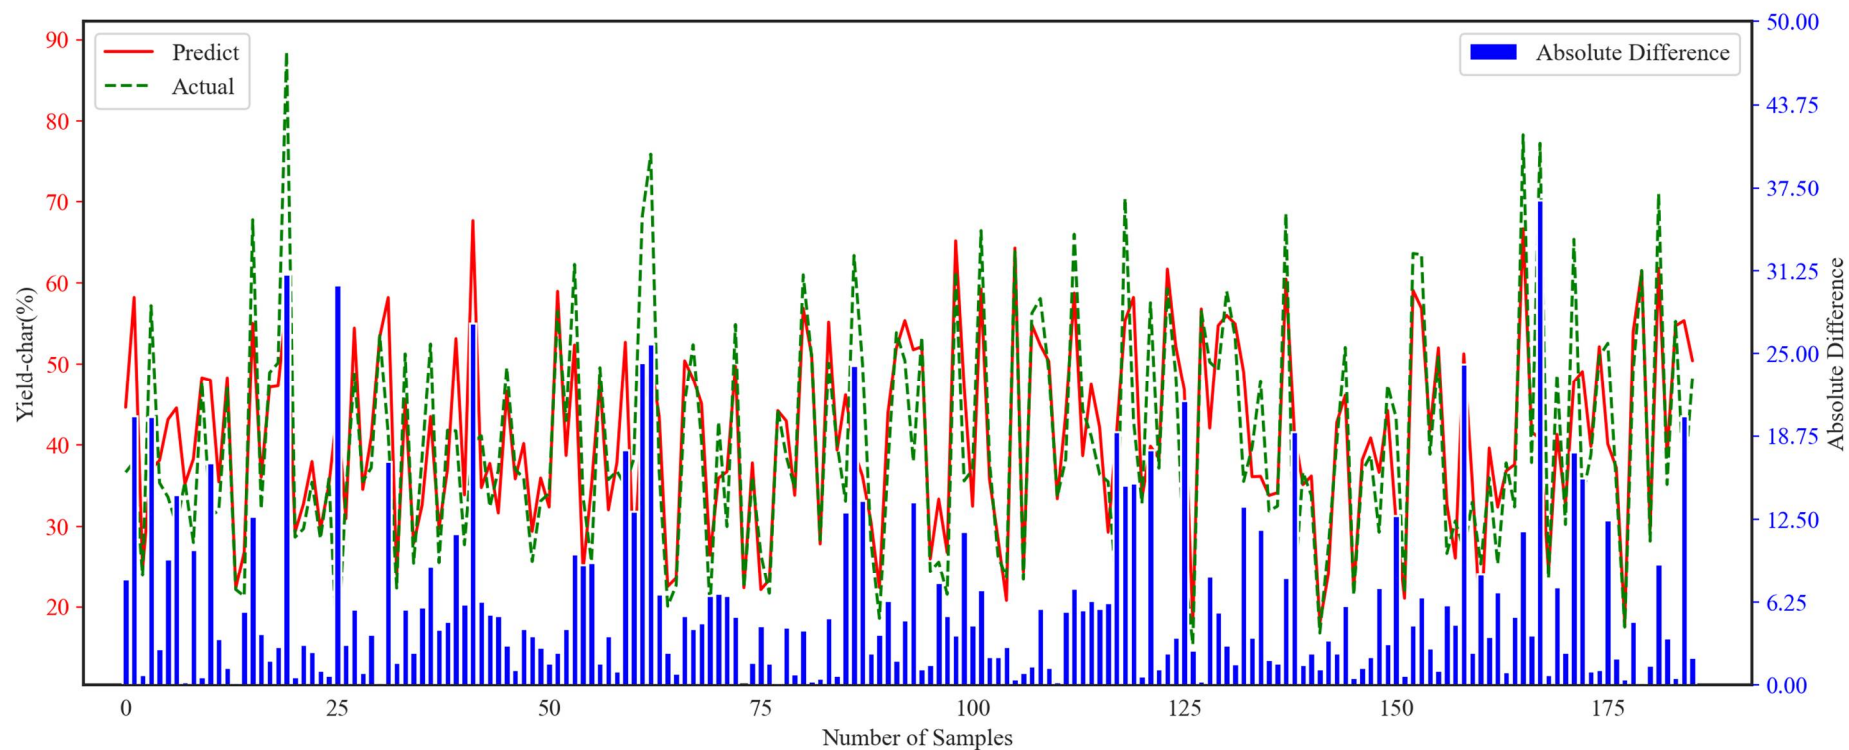

Figure S10 The graph displays LightGBM's fitting curve for Yield-char. The red dashed line represents the predicted value, the green dashed line represents the true value, and the blue bar represents the absolute difference between the predicted and true values. The left axis indicates the value of Yield, while the right axis indicates the absolute difference.

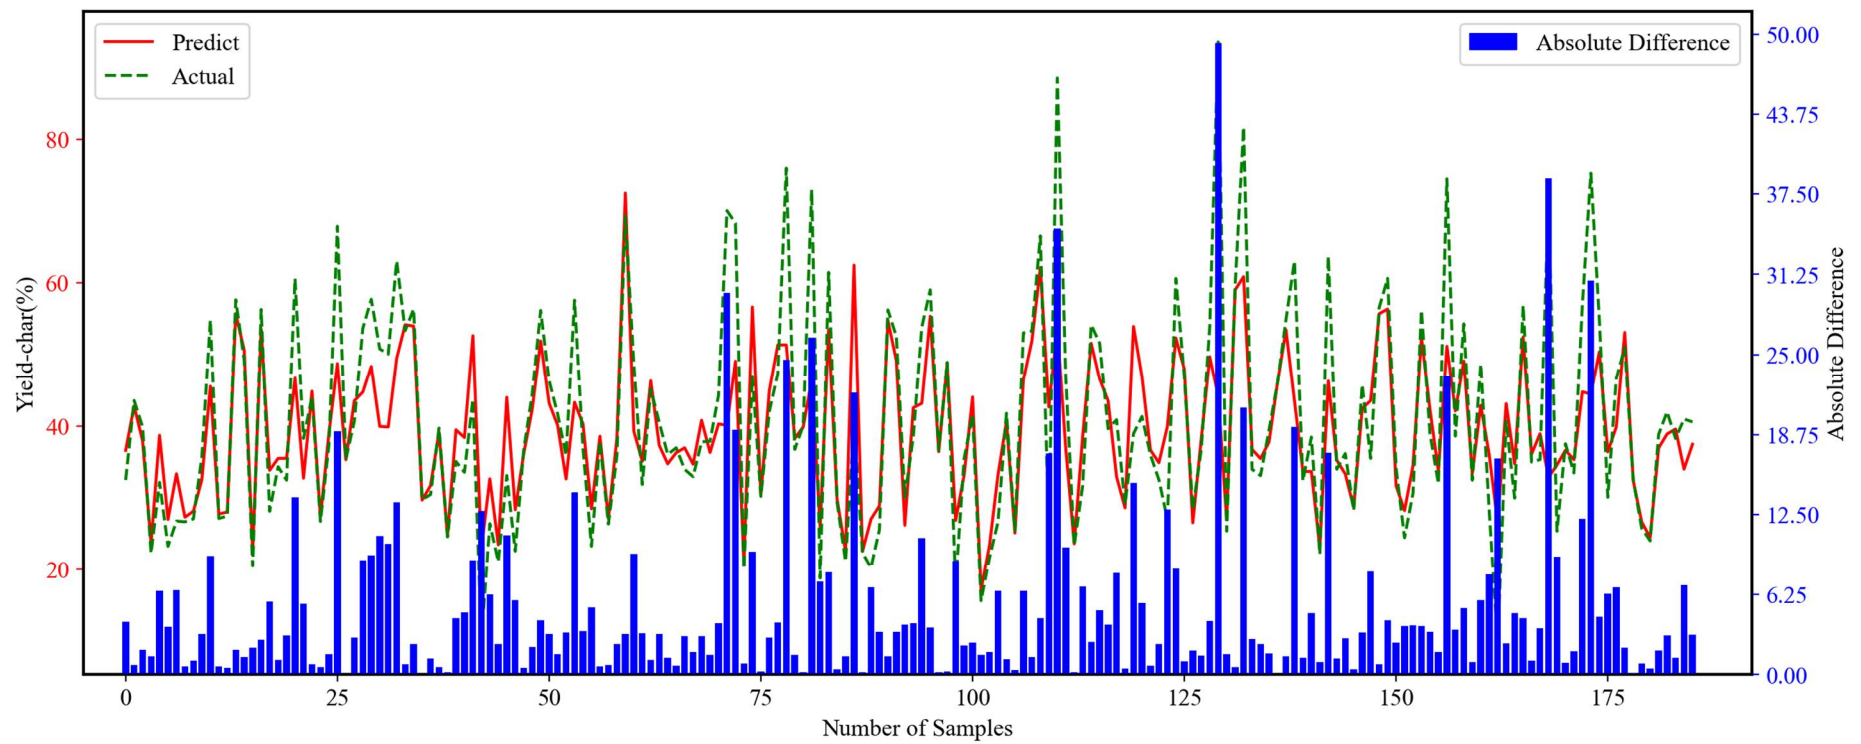

Figure S11 The graph displays RandomForest's fitting curve for Yield-char. The red dashed line represents the predicted value, the green dashed line represents the true value, and the blue bar represents the absolute difference between the predicted and true values. The left axis indicates the value of Yield, while the right axis indicates the absolute difference.

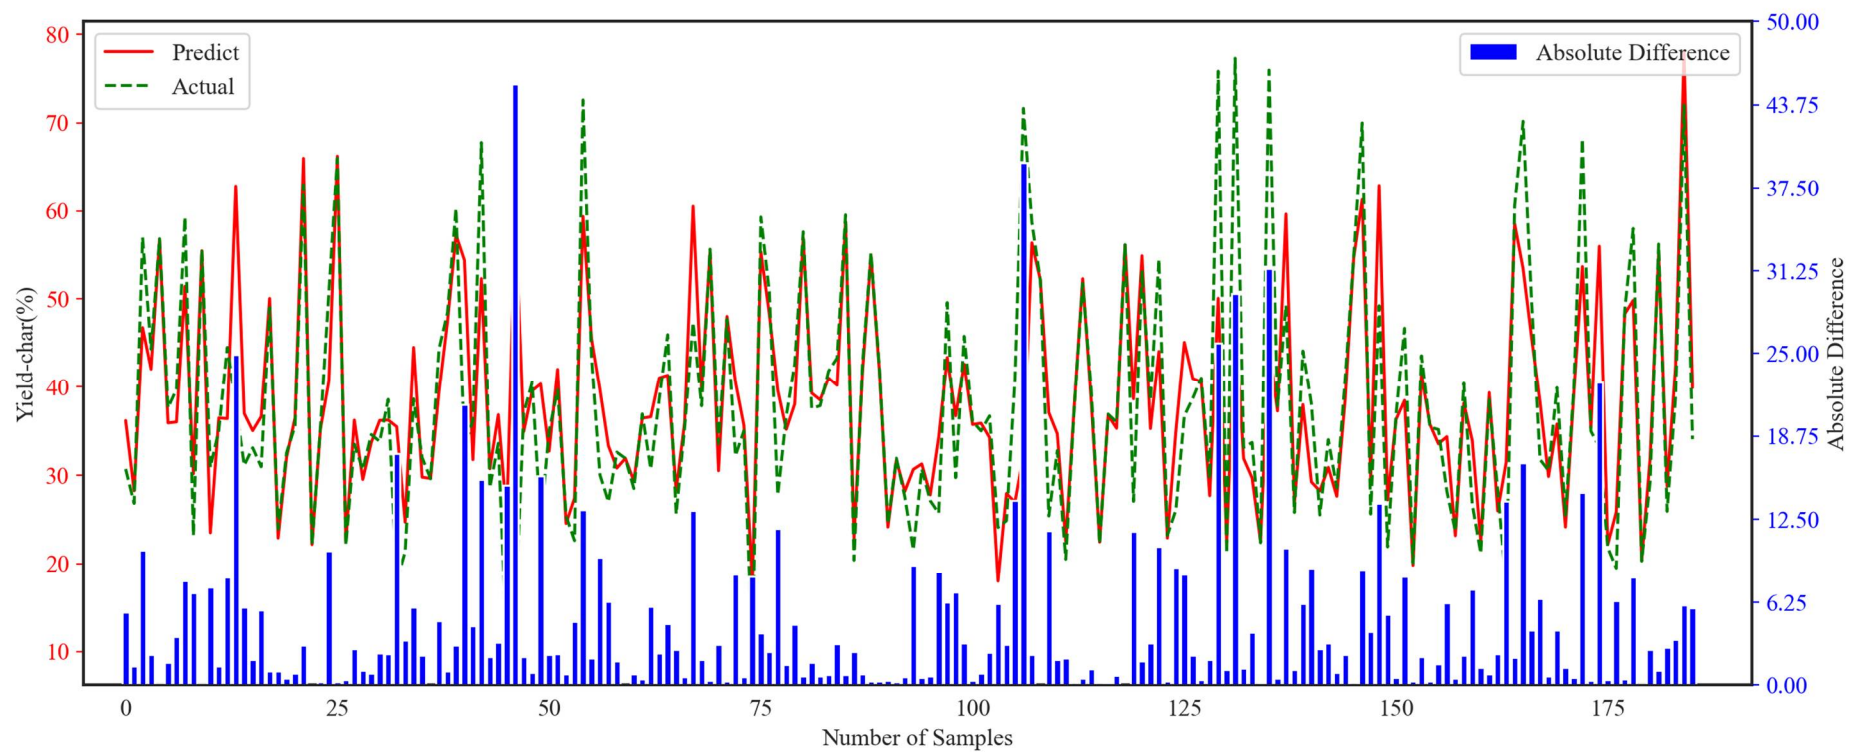

Figure S12 The graph displays XGBoost's fitting curve for Yield-char. The red dashed line represents the predicted value, the green dashed line represents the true value, and the blue bar represents the absolute difference between the predicted and true values. The left axis indicates the value of Yield, while the right axis indicates the absolute difference.



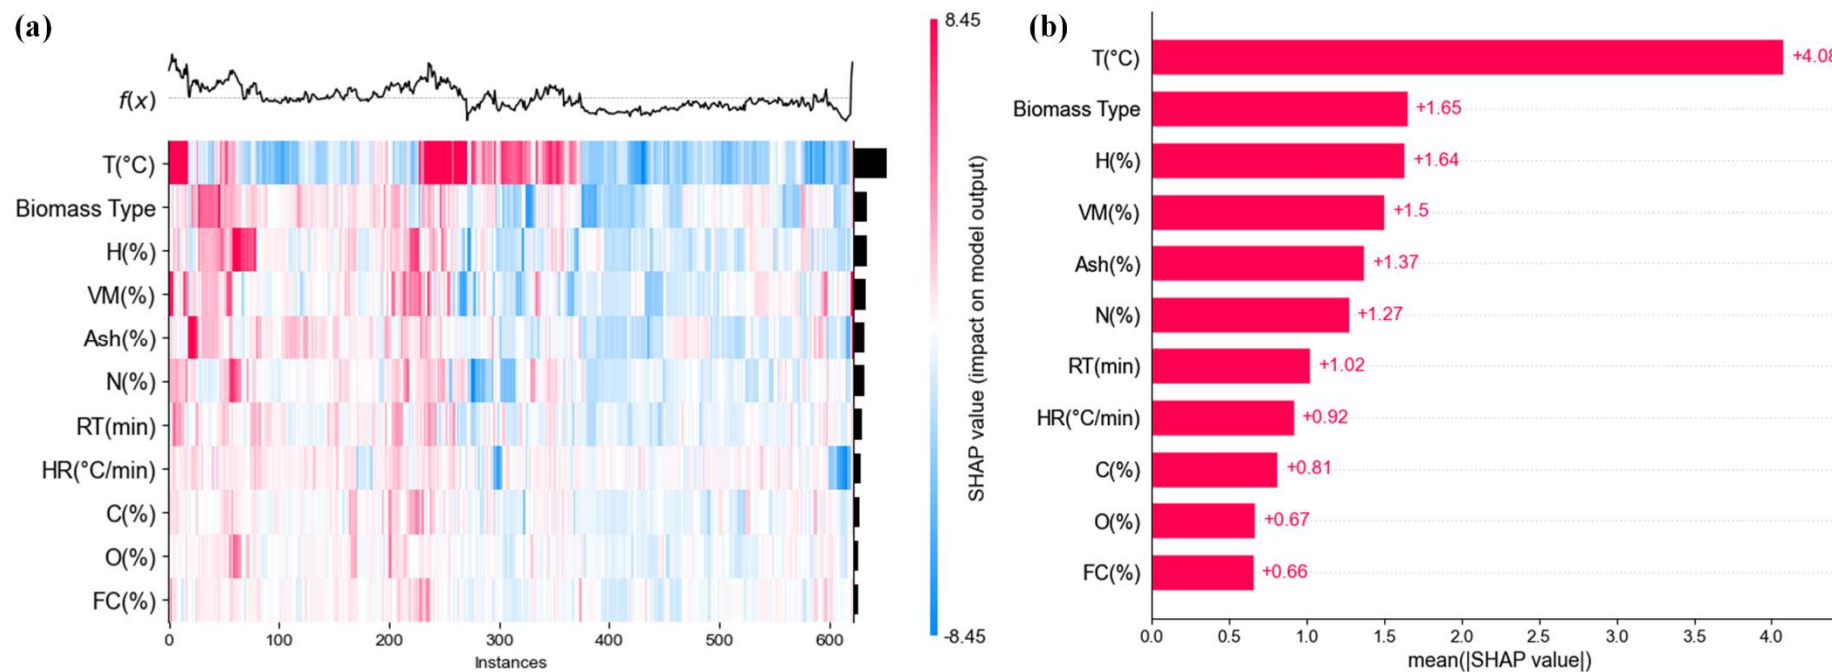

Figure S13 Display information Yiled-char:(a) Characteristic importance heatmap, (b)Characteristic Importance Bar Chart

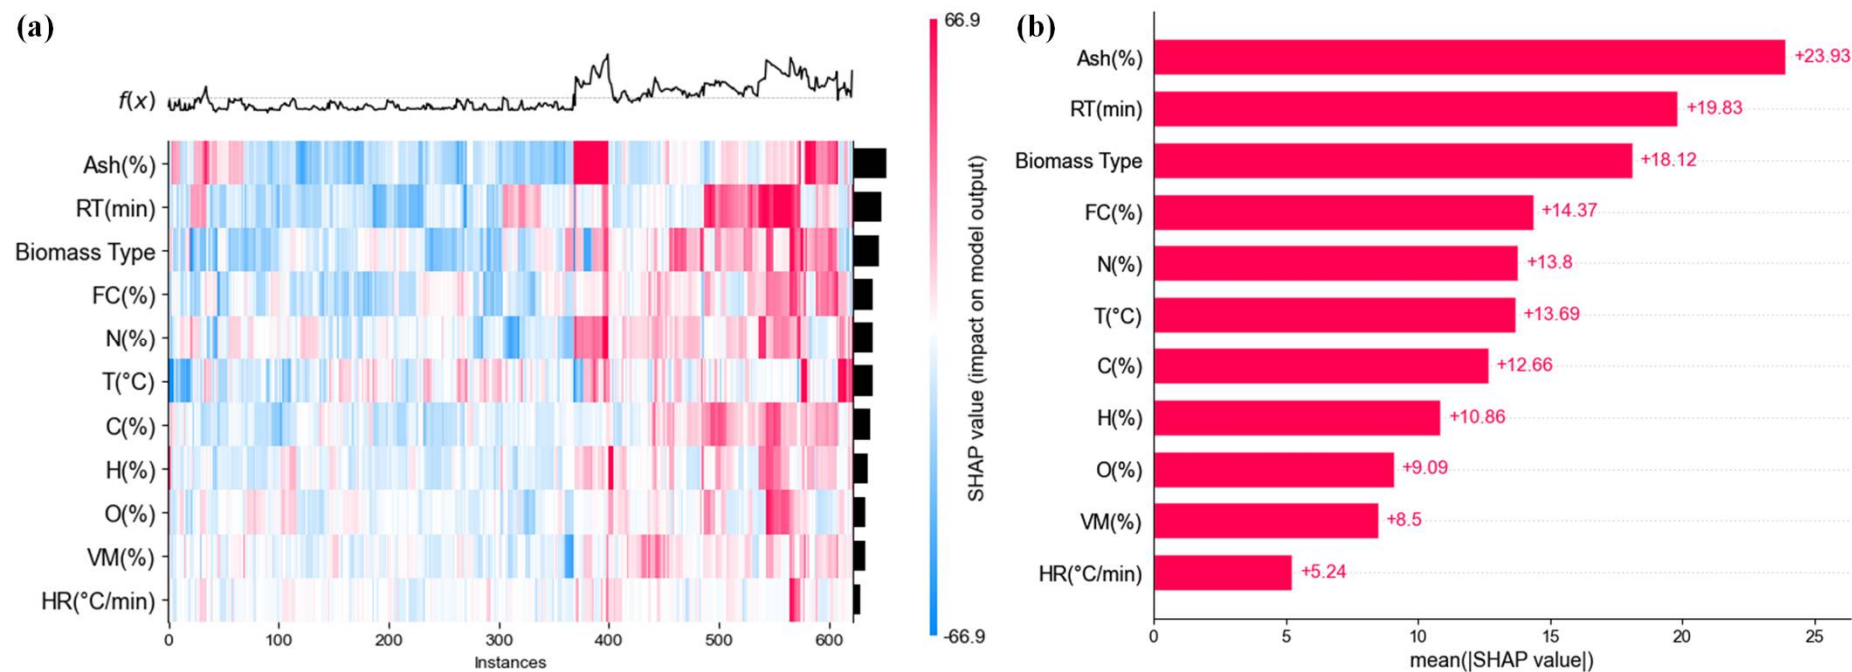

Figure S14 Display information SSA-char: (a) Characteristic importance heatmap, (b) Characteristic Importance Bar Chart
